# Supplementary material for: Evidence for Fgf and Wnt regulation of Lhx2 during limb development via two limb-specific Lhx2-associated cis-regulatory modules
Source: Front Cell Dev Biol. 2025 Feb 20;13:1552716. doi: 10.3389/fcell.2025.1552716 (PMC11882541; doi:10.3389/fcell.2025.1552716)
Supplement: Supplementary file 2 [file Table1.xlsx]

## Sheet: Supplementary Table S1
Supplementary Table 1
Table showing the 49 conserved non-coding DNA regions within the Lhx2 locus with their respective chromosomal coordinates and the number of transcription factor binding sites (TFBS) associated with each region.
The 12 PCRMs with 3 or more chromatin marks are highlighted in yellow and were selected for further analysis.
PCRM #	Hum 2006 ( hg18)	Mus 2007 (mm9)	Comment	P300	Pol II	Med12	H3k27ac	H3k4me2	H3k27me3	# of ChrMakrs	#TF
PCRM- (31)	chr9:125,206,278-125,206,668	chr2:37,673,112-37,673,479		0	0	0	0	0	0	0	26
PCRM- (30)	chr9:125,208,093-125,210,999	chr2:37,673,481-37,675,933		0	0	0	0	0	0	0	289
PCRM- (29)	chr9:125,211,002-125,212,961	chr2:37,675,934-37,677,287		0	0	0	0	0	0	0	189
PCRM(-28)	chr9:125,212,962-125,213,027	chr2:37,677,288-37,677,338		0	0	0	1	0	0	1	5
PCRM(-27)	chr9:125,213,028-125,236,829	chr2:37,677,339-37,694,456		0	0	0	1	0	0	1	4
PCRM(-26)	chr9:125,236,884-125,278,566	chr2:37,694,511-37,729,072		1	0	0	1	1	0	3	~3600
PCRM(-25) (re-named called PCRM-10 in Figure 1A)	chr9:125,239,933-125,241,312	chr2:37,697,250-37,698,549		1	1	1	1	1	0	5	139
PCRM (-24)	chr9:125,278,646-125,280,608	chr2:37,729,169-37,729,961		0	0	0	0	0	0	0	185
PCRM (-23)	chr9:125,281,190-125,296,774	chr2:37,730,609-37,745,010		0	0	0	0	0	0	0	~1020
PCRM (-22)	chr9:125,296,856-125,299,332	chr2:37,745,090-37,747,206	CNE2/3 (Lee et al., 2011)							0
PCRM (-21)	chr9:125,307,068-125,314,763	chr2:37,752,116-37,759,415		0	0	0	0	0	0	0	704
PCRM (-20)	chr9:125,369,185-125,371,809	chr2:37,799,360-37,802,110		1	1	0	1	1	0	4	211
PCRM(-19) (renamed CRM (-9) in Figure 1A or LASARM)	chr9:125,370,599-125,371,797	chr2:37,800,926-37,802,099		1	1	1	1	1	0	5	90
PCRM (A) (renamed CRM (-8) in Figure 1A or LADLRM)	chr9: 125,399,975-125,400,328	chr2:37,827,740-37,829,990		1	1	1	1	1	0	5	43
PCRM(B) (re-named called PCRM (-7) in Figure 1A)	chr9:125,413,318-125,413,637	chr2:37,841,223-37,841,785		1	1	1	0	0	0	3	37
PCRM (-18)	chr9:125,425,672-125,426,465	chr2:37,853,209-37,854,003		0	0	0	0	0	0	0	57
PCRM (-17)	chr9:125,480,572-125,481,266	chr2:37,907,046-37,907,706		0	0	0	0	0	0	0	65
PCRM (-16)	chr9:125,489,268-125,491,532	chr2:37,923,597-37,925,408								0
PCRM (-15)	chr9:125,491,557-125,498,993	chr2:37,925,457-37,930,418		0	0	0	0	0	0	0	698
PCRM (-14)	chr9:125,514,396-125,516,898	chr2:37,946,909-37,949,186		0	0	0	0	0	0	0	207
PCRM (-13.1)	chr9:125,518,156-125,530,153	chr2:37,949,735-37,958,356		0	0	0	0	0	0	0
PCRM (-13) ( re-named called PCRM (-6) in Figure 1A)	chr9:125,519,802-125,520,944	chr2:37,951,397-37,952,538		1	1	1	1	1	0	5	93
PCRM (-12) ( re-named called PCRM (-5) in Figure 1A)	chr9:125,527,150-125,528,130	chr2:37,955,521-37,956,549		0	1	1	1	1	0	4	69
PCRM (-11)	chr9:125,542,751-125,545,402	chr2:37,965,944-37,968,307	CNE5/6 (Lee et al., 2011)							0
PCRM (-10)	chr9:125,572,498-125,580,115	chr2:37,993,273-38,000,721	CNE7 (Lee et al., 2011)							0
PCRM (-9)	chr9:125,588,303-125,596,050	chr2:38,009,062-38,017,019		0	0	0	0	0	0	0	17
PCRM (-8)	chr9:125,596,051-125,596,350	chr2:38,017,020-38,017,465	CNE10 (Lee et al., 2011)
PCRM (-7) (re-named called PCRM (-4) in Figure 1A)	chr9:125,597,240-125,598,303	chr2:38,018,343-38,019,526		0	1	1	1	0	0	3	101
PCRM (-6)	chr9:125,636,137-125,637,608	chr2:38,051,193-38,052,627		0	0	0	0	0	0	0	150
PCRM (-5)	chr9:125,642,168-125,642,677	chr2:38,059,349-38,059,850		0	0	0	0	0	0	0	46
PCRM (-4)	chr9:125,662,383-125,665,917	chr2:38,075,610-38,079,609		0	0	0	0	0	0	0	336
PCRM(-3)	chr9:125,798,115-125,799,496	chr2:38,191,485-38,192,798		1	1	1	0	1	1	5	148
PCRM(-2)	chr9:125,802,912-125,804,882	chr2:38,195,829-38,197,872		0	1	1	0	0	1	3	184
PCRM(-2.1)	chr9:125,808,310-125,809,327	chr2:38,201,389-38,202,408		0	0	0	0	0	0	0	87
PCRM (-1)	chr9:125,810,068-125,811,476	chr2:38,203,134-38,204,522		1	1	1	1	1	1	6	147
Lhx2 promoter	chr9:125,812,635-125,814,604	chr2:38,205,554-38,207,449								0
PCRM1	chr9:125,881,204-125,881,701	chr2:38,250,586-38,251,084		0	0	0	0	0	0	0	58
PCRM2	chr9:125,890,874-125,891,557	chr2:38,258,753-38,259,378		0	0	0	0	0	0	0	50
PCRM3	chr9:125,900,650-125,900,995	chr2:38,264,758-38,265,095		0	0	0	0	0	0	0	38
PCRM4	chr9:125,982,843-125,983,196	chr2:38,316,482-38,316,833		0	0	0	0	0	0	0	45
PCRM5	chr9:126,014,322-126,015,721	chr2:38,332,146-38,333,440		0	0	0	0	0	0	0	130
PCRM6	chr9:126,105,727-126,109,614	chr2:38,407,451-38,410,938		0	0	0	0	0	0	0	386
PCRM7	chr9:126,131,257-126,135,022	chr2:38,426,617-38,429,258		0	0	0	0	0	0	0	397
PCRM8 (re-named called PCRM1 in Figure 1A)	chr9:126,162,777-126,164,318	chr2:38,449,952-38,451,383		1	1	1	0	0	0	3	145
PCRM8.1	chr9:126,172,141-126,174,129	chr2:38,457,201-38,459,046		0	0	0	0	0	0	0	189
PCRM8.2	chr9:126,177,574-126,182,410	chr2:38,462,075-38,466,296		0	0	0	0	0	0	0	417
PCRM9 (re-named called PCRM2 in Figure 1A)	chr9:126,179,446-126,180,852	chr2:38,463,911-38,465,405		1	1	1	0	0	0	3	127
PCRM9.1	chr9:126,187,435-126,188,251	chr2:38,469,687-38,470,477		0	0	0	0	0	0	0	63
PCRM9.2	chr9:126,194,627-126,195,746	chr2:38,476,788-38,477,893		0	0	0	0	0	0	0	87
PCRM9.3	chr9:126,242,849-126,244,044	chr2:38,513,657-38,514,631		0	0	0	0	0	0	0	129

## Sheet: Supplementary Table S2
Supplementary Table 2. Table of primers used to isolate the chicken and mouse PCRM sequences.
Chicken PCRMs
Primer Name	Forward	Reverse
PCRM-10	CTGATAACCACTCACCAAAATTAGG	GGAAAAAGGACAAAGGCTGTAAG
PCRM-9/ LASARM	CTACCCCCTCTCTTTGCTATTCC	GATTTCACTCCCAGCATCC
PCRM-8/ LADLRM	TGAAAACACCGTAATAGCACAG	AGGATCAGGGTTCAGCACATCAAG
PCRM-7	TTTCACCCACATCTCTTCATTTC	TTTCTTATGCGTGGTGACAGGC
PCRM-6	CCAGTTACTACCACATAACCTGAGG	CCTTGACACCCCTTCATTATTC
PCRM-5	GATTTGAGAGCTTAGGACACATTAC	GCAGACTGGTTGGTGTTCATAC
PCRM-4	CTGTGTGACGATAAATGACAAGC	GGTACAAGTGCAATGAAAAAGAGAC
PCRM-3	CAAAGAATTATTTCTGCAGATATTTGC	CAGCTAAAATTTTTAGATGCAGAAGTG
PCRM-2	GGTTGTAGAACAGAAAGGAATGC	CCAATCTTAGCCAATCATCTTCTT
PCRM-1	TATCGAGCAAGTGAATCTGTAGC	CTATCGAGCAAGTGAATCTGTAGC
PCRM 1	CCCAAAGCTTCTGATTTCTTCC	CCATCCTGCTGTGCTTTTC
PCRM 2	CGTCATTGCCATTTTACAGC	CCTCTCTATTAGATGTGCTGTTCTTCC
Mouse LADLRM	TGGCCTTTGTGGAAACTGTTTTC	AGGAGGGCAGAGTTTCACTTTTATG
Mouse LASARM	AGTTAATGAAGTGCTTGGTGTTTATC	TAAGGAATTGTCTTCATTCTGCAC

## Sheet: Supplementary Table S3
Supplementary Table 3
10KBmatrix_min3000_max31500_step1500_thres0.05_delta0.01_fdr_domains
2	3200000	3390000	ID_0.01_1	-0.274502	.	3200000	3390000	31120180
2	3390000	3720000	ID_0.01_2	-0.226873	.	3390000	3720000	51,160,44
2	3720000	4140000	ID_0.01_3	-0.260516	.	3720000	4140000	31120180
2	4140000	4410000	ID_0.01_4	0.645635	.	4140000	4410000	51,160,44
2	4410000	4570000	ID_0.01_5	0.0899133	.	4410000	4570000	31120180
2	4570000	4800000	ID_0.01_6	0.0783564	.	4570000	4800000	51,160,44
2	4800000	4940000	ID_0.01_7	-0.439949	.	4800000	4940000	31120180
2	4940000	5370000	ID_0.01_8	-0.163949	.	4940000	5370000	51,160,44
2	5370000	5770000	ID_0.01_9	0.176588	.	5370000	5770000	31120180
2	5770000	6100000	ID_0.01_10	-0.468467	.	5770000	6100000	51,160,44
2	6100000	6350000	ID_0.01_11	0.0865217	.	6100000	6350000	31120180
2	6350000	6650000	ID_0.01_12	0.0080829	.	6350000	6650000	51,160,44
2	6650000	6760000	ID_0.01_13	-0.0018264	.	6650000	6760000	31120180
2	6760000	7320000	ID_0.01_14	-0.0276486	.	6760000	7320000	51,160,44
2	7320000	7580000	ID_0.01_15	-0.408177	.	7320000	7580000	31120180
2	7580000	8100000	ID_0.01_16	-0.561461	.	7580000	8100000	51,160,44
2	8100000	8580000	ID_0.01_17	-0.546032	.	8100000	8580000	31120180
2	8580000	9800000	ID_0.01_18	-0.786359	.	8580000	9800000	51,160,44
2	9800000	9970000	ID_0.01_19	0.0874059	.	9800000	9970000	31120180
2	9970000	10320000	ID_0.01_20	-0.192195	.	9970000	10320000	51,160,44
2	10320000	11010000	ID_0.01_21	-0.366801	.	10320000	11010000	31120180
2	11010000	11230000	ID_0.01_22	-0.391862	.	11010000	11230000	51,160,44
2	11230000	11530000	ID_0.01_23	-0.303753	.	11230000	11530000	31120180
2	11530000	11850000	ID_0.01_24	-0.301494	.	11530000	11850000	51,160,44
2	11850000	12370000	ID_0.01_25	-0.654933	.	11850000	12370000	31120180
2	12370000	12930000	ID_0.01_26	-0.517929	.	12370000	12930000	51,160,44
2	12930000	13190000	ID_0.01_27	0.0525946	.	12930000	13190000	31120180
2	13190000	13550000	ID_0.01_28	-0.634869	.	13190000	13550000	51,160,44
2	13550000	13930000	ID_0.01_29	-0.143211	.	13550000	13930000	31120180
2	13930000	14230000	ID_0.01_30	-0.480873	.	13930000	14230000	51,160,44
2	14230000	14650000	ID_0.01_31	-0.415444	.	14230000	14650000	31120180
2	14650000	14980000	ID_0.01_32	-0.500403	.	14650000	14980000	51,160,44
2	14980000	16270000	ID_0.01_33	-0.697428	.	14980000	16270000	31120180
2	16270000	17340000	ID_0.01_34	-0.595105	.	16270000	17340000	51,160,44
2	17340000	17950000	ID_0.01_35	-0.663691	.	17340000	17950000	31120180
2	17950000	18490000	ID_0.01_36	0.0340686	.	17950000	18490000	51,160,44
2	18490000	18780000	ID_0.01_37	-0.0884138	.	18490000	18780000	31120180
2	18780000	19310000	ID_0.01_38	0.366898	.	18780000	19310000	51,160,44
2	19310000	19670000	ID_0.01_39	-0.660113	.	19310000	19670000	31120180
2	19670000	19910000	ID_0.01_40	-0.13589	.	19670000	19910000	51,160,44
2	19910000	20410000	ID_0.01_41	-0.462014	.	19910000	20410000	31120180
2	20410000	20750000	ID_0.01_42	-0.168979	.	20410000	20750000	51,160,44
2	20750000	21210000	ID_0.01_43	-0.520419	.	20750000	21210000	31120180
2	21210000	22240000	ID_0.01_44	-0.661528	.	21210000	22240000	51,160,44
2	22240000	22280000	ID_0.01_45	-0.429176	.	22240000	22280000	31120180
2	22280000	22430000	ID_0.01_46	-0.424262	.	22280000	22430000	51,160,44
2	22430000	22750000	ID_0.01_47	-0.378706	.	22430000	22750000	31120180
2	22750000	23100000	ID_0.01_48	-0.553699	.	22750000	23100000	51,160,44
2	23100000	23450000	ID_0.01_49	-0.804153	.	23100000	23450000	31120180
2	23450000	23800000	ID_0.01_50	-0.5791	.	23450000	23800000	51,160,44
2	23800000	24050000	ID_0.01_51	-0.558408	.	23800000	24050000	31120180
2	24050000	24090000	ID_0.01_52	-0.626327	.	24050000	24090000	51,160,44
2	24090000	24440000	ID_0.01_53	-0.621781	.	24090000	24440000	31120180
2	24440000	24650000	ID_0.01_54	0.288579	.	24440000	24650000	51,160,44
2	24650000	24770000	ID_0.01_55	-0.299622	.	24650000	24770000	31120180
2	24770000	25280000	ID_0.01_56	-0.130835	.	24770000	25280000	51,160,44
2	25280000	25490000	ID_0.01_57	0.249329	.	25280000	25490000	31120180
2	25490000	25660000	ID_0.01_58	-0.279156	.	25490000	25660000	51,160,44
2	25660000	26000000	ID_0.01_59	0.107982	.	25660000	26000000	31120180
2	26000000	26160000	ID_0.01_60	0.751449	.	26000000	26160000	51,160,44
2	26160000	26240000	ID_0.01_61	0.486711	.	26160000	26240000	31120180
2	26240000	26500000	ID_0.01_62	0.476004	.	26240000	26500000	51,160,44
2	26500000	26760000	ID_0.01_63	-0.425886	.	26500000	26760000	31120180
2	26760000	27110000	ID_0.01_64	-0.055607	.	26760000	27110000	51,160,44
2	27110000	27330000	ID_0.01_65	0.263888	.	27110000	27330000	31120180
2	27330000	27620000	ID_0.01_66	0.135053	.	27330000	27620000	51,160,44
2	27620000	27840000	ID_0.01_67	0.720166	.	27620000	27840000	31120180
2	27840000	28050000	ID_0.01_68	0.877942	.	27840000	28050000	51,160,44
2	28050000	28440000	ID_0.01_69	0.830568	.	28050000	28440000	31120180
2	28440000	28760000	ID_0.01_70	-0.192279	.	28440000	28760000	51,160,44
2	28760000	28980000	ID_0.01_71	1.1681	.	28760000	28980000	31120180
2	28980000	29470000	ID_0.01_72	0.0373294	.	28980000	29470000	51,160,44
2	29470000	29600000	ID_0.01_73	0.0183812	.	29470000	29600000	31120180
2	29600000	30270000	ID_0.01_74	-0.0132482	.	29600000	30270000	51,160,44
2	30270000	30670000	ID_0.01_75	-0.437562	.	30270000	30670000	31120180
2	30670000	30820000	ID_0.01_76	0.53404	.	30670000	30820000	51,160,44
2	30820000	31030000	ID_0.01_77	-0.231776	.	30820000	31030000	31120180
2	31030000	31320000	ID_0.01_78	0.40385	.	31030000	31320000	51,160,44
2	31320000	31520000	ID_0.01_79	0.25953	.	31320000	31520000	31120180
2	31520000	31640000	ID_0.01_80	0.490687	.	31520000	31640000	51,160,44
2	31640000	31820000	ID_0.01_81	0.857014	.	31640000	31820000	31120180
2	31820000	32090000	ID_0.01_82	0.377915	.	31820000	32090000	51,160,44
2	32090000	32430000	ID_0.01_83	0.201517	.	32090000	32430000	31120180
2	32430000	32550000	ID_0.01_84	0.150451	.	32430000	32550000	51,160,44
2	32550000	32820000	ID_0.01_85	0.497924	.	32550000	32820000	31120180
2	32820000	32980000	ID_0.01_86	-0.0666084	.	32820000	32980000	51,160,44
2	32980000	33280000	ID_0.01_87	0.618264	.	32980000	33280000	31120180
2	33280000	33510000	ID_0.01_88	-0.148184	.	33280000	33510000	51,160,44
2	33510000	33600000	ID_0.01_89	0.506306	.	33510000	33600000	31120180
2	33600000	33820000	ID_0.01_90	0.158406	.	33600000	33820000	51,160,44
2	33820000	34100000	ID_0.01_91	0.684801	.	33820000	34100000	31120180
2	34100000	34250000	ID_0.01_92	0.68038	.	34100000	34250000	51,160,44
2	34250000	34520000	ID_0.01_93	0.505322	.	34250000	34520000	31120180
2	34520000	35010000	ID_0.01_94	-0.259942	.	34520000	35010000	51,160,44
2	35010000	35380000	ID_0.01_95	-0.149218	.	35010000	35380000	31120180
2	35380000	35830000	ID_0.01_96	0.237253	.	35380000	35830000	51,160,44
2	35830000	36210000	ID_0.01_97	-0.147869	.	35830000	36210000	31120180
2	36210000	37200000	ID_0.01_98	-0.926774	.	36210000	37200000	51,160,44
2	37200000	37660000	ID_0.01_99	-0.982396	.	37200000	37660000	31120180
2	37660000	38230000	ID_0.01_100	-0.120949	.	37660000	38230000	51,160,44
2	38230000	38500000	ID_0.01_101	0.254715	.	38230000	38500000	31120180
2	38500000	38640000	ID_0.01_102	0.220112	.	38500000	38640000	51,160,44
2	38640000	38920000	ID_0.01_103	0.0360048	.	38640000	38920000	31120180
2	38920000	39080000	ID_0.01_104	-0.297627	.	38920000	39080000	51,160,44
2	39080000	39300000	ID_0.01_105	-0.621231	.	39080000	39300000	31120180
2	39300000	39470000	ID_0.01_106	-0.730008	.	39300000	39470000	51,160,44
2	39470000	40690000	ID_0.01_107	-0.752444	.	39470000	40690000	31120180
2	40690000	41910000	ID_0.01_108	-0.619679	.	40690000	41910000	51,160,44
2	41910000	42580000	ID_0.01_109	-0.670667	.	41910000	42580000	31120180
2	42580000	43510000	ID_0.01_110	-0.648983	.	42580000	43510000	51,160,44
2	43510000	43790000	ID_0.01_111	-0.822757	.	43510000	43790000	31120180
2	43790000	44720000	ID_0.01_112	-0.360613	.	43790000	44720000	51,160,44
2	44720000	45100000	ID_0.01_113	-0.212591	.	44720000	45100000	31120180
2	45100000	46060000	ID_0.01_114	0.128433	.	45100000	46060000	51,160,44
2	46060000	47330000	ID_0.01_115	-0.274756	.	46060000	47330000	31120180
2	47330000	48770000	ID_0.01_116	-0.82547	.	47330000	48770000	51,160,44
2	48770000	49140000	ID_0.01_117	-0.652182	.	48770000	49140000	31120180
2	49140000	49600000	ID_0.01_118	-0.13715	.	49140000	49600000	51,160,44
2	49600000	50150000	ID_0.01_119	-0.39933	.	49600000	50150000	31120180
2	50150000	50400000	ID_0.01_120	-0.62672	.	50150000	50400000	51,160,44
2	50400000	51000000	ID_0.01_121	0.0842061	.	50400000	51000000	31120180
2	51000000	51130000	ID_0.01_122	-0.055636	.	51000000	51130000	51,160,44
2	51130000	51430000	ID_0.01_123	0.149169	.	51130000	51430000	31120180
2	51430000	51790000	ID_0.01_124	0.34438	.	51430000	51790000	51,160,44
2	51790000	51930000	ID_0.01_125	-0.343661	.	51790000	51930000	31120180
2	51930000	52490000	ID_0.01_126	-0.356436	.	51930000	52490000	51,160,44
2	52490000	52550000	ID_0.01_127	-0.304105	.	52490000	52550000	31120180
2	52550000	53090000	ID_0.01_128	-0.316695	.	52550000	53090000	51,160,44
2	53090000	53600000	ID_0.01_129	-0.814748	.	53090000	53600000	31120180
2	53600000	53960000	ID_0.01_130	-0.485571	.	53600000	53960000	51,160,44
2	53960000	54550000	ID_0.01_131	-0.691179	.	53960000	54550000	31120180
2	54550000	55910000	ID_0.01_132	-0.726563	.	54550000	55910000	51,160,44
2	55910000	56720000	ID_0.01_133	-0.953069	.	55910000	56720000	31120180
2	56720000	56930000	ID_0.01_134	-0.513083	.	56720000	56930000	51,160,44
2	56930000	57230000	ID_0.01_135	-0.462802	.	56930000	57230000	31120180
2	57230000	57560000	ID_0.01_136	-0.106438	.	57230000	57560000	51,160,44
2	57560000	57820000	ID_0.01_137	-0.355693	.	57560000	57820000	31120180
2	57820000	58280000	ID_0.01_138	-0.684033	.	57820000	58280000	51,160,44
2	58280000	58540000	ID_0.01_139	-0.182298	.	58280000	58540000	31120180
2	58540000	59000000	ID_0.01_140	-0.450736	.	58540000	59000000	51,160,44
2	59000000	59310000	ID_0.01_141	0.229315	.	59000000	59310000	31120180
2	59310000	59780000	ID_0.01_142	-0.368329	.	59310000	59780000	51,160,44
2	59780000	60060000	ID_0.01_143	0.134194	.	59780000	60060000	31120180
2	60060000	60560000	ID_0.01_144	-0.0428245	.	60060000	60560000	51,160,44
2	60560000	60810000	ID_0.01_145	0.0649847	.	60560000	60810000	31120180
2	60810000	61430000	ID_0.01_146	0.352723	.	60810000	61430000	51,160,44
2	61430000	61680000	ID_0.01_147	-0.60649	.	61430000	61680000	31120180
2	61680000	62070000	ID_0.01_148	-0.451987	.	61680000	62070000	51,160,44
2	62070000	62510000	ID_0.01_149	-0.353474	.	62070000	62510000	31120180
2	62510000	63290000	ID_0.01_150	-0.554012	.	62510000	63290000	51,160,44
2	63290000	63510000	ID_0.01_151	-0.847028	.	63290000	63510000	31120180
2	63510000	64780000	ID_0.01_152	-0.477481	.	63510000	64780000	51,160,44
2	64780000	65230000	ID_0.01_153	-0.47972	.	64780000	65230000	31120180
2	65230000	65500000	ID_0.01_154	-0.273585	.	65230000	65500000	51,160,44
2	65500000	65580000	ID_0.01_155	-0.33723	.	65500000	65580000	31120180
2	65580000	66090000	ID_0.01_156	-0.338245	.	65580000	66090000	51,160,44
2	66090000	66260000	ID_0.01_157	-0.44334	.	66090000	66260000	31120180
2	66260000	67260000	ID_0.01_158	-0.490045	.	66260000	67260000	51,160,44
2	67260000	68190000	ID_0.01_159	-0.44345	.	67260000	68190000	31120180
2	68190000	68400000	ID_0.01_160	-0.295348	.	68190000	68400000	51,160,44
2	68400000	68610000	ID_0.01_161	-0.392509	.	68400000	68610000	31120180
2	68610000	69050000	ID_0.01_162	-0.522756	.	68610000	69050000	51,160,44
2	69050000	69430000	ID_0.01_163	-0.105548	.	69050000	69430000	31120180
2	69430000	69870000	ID_0.01_164	-0.406111	.	69430000	69870000	51,160,44
2	69870000	70500000	ID_0.01_165	-0.335377	.	69870000	70500000	31120180
2	70500000	70950000	ID_0.01_166	-0.418681	.	70500000	70950000	51,160,44
2	70950000	71230000	ID_0.01_167	-0.0904001	.	70950000	71230000	31120180
2	71230000	71410000	ID_0.01_168	0.616869	.	71230000	71410000	51,160,44
2	71410000	71690000	ID_0.01_169	0.30736	.	71410000	71690000	31120180
2	71690000	71850000	ID_0.01_170	-0.162838	.	71690000	71850000	51,160,44
2	71850000	72040000	ID_0.01_171	-0.0636966	.	71850000	72040000	31120180
2	72040000	72350000	ID_0.01_172	0.365886	.	72040000	72350000	51,160,44
2	72350000	72820000	ID_0.01_173	0.254334	.	72350000	72820000	31120180
2	72820000	73120000	ID_0.01_174	0.401576	.	72820000	73120000	51,160,44
2	73120000	73400000	ID_0.01_175	-0.0804993	.	73120000	73400000	31120180
2	73400000	73730000	ID_0.01_176	-0.306099	.	73400000	73730000	51,160,44
2	73730000	73900000	ID_0.01_177	0.176022	.	73730000	73900000	31120180
2	73900000	74120000	ID_0.01_178	0.601492	.	73900000	74120000	51,160,44
2	74120000	74520000	ID_0.01_179	1.01837	.	74120000	74520000	31120180
2	74520000	74980000	ID_0.01_180	-0.648347	.	74520000	74980000	51,160,44
2	74980000	75440000	ID_0.01_181	0.394593	.	74980000	75440000	31120180
2	75440000	75820000	ID_0.01_182	-0.385923	.	75440000	75820000	51,160,44
2	75820000	75960000	ID_0.01_183	0.755768	.	75820000	75960000	31120180
2	75960000	76200000	ID_0.01_184	-0.161481	.	75960000	76200000	51,160,44
2	76200000	76720000	ID_0.01_185	-0.192604	.	76200000	76720000	31120180
2	76720000	77210000	ID_0.01_186	-0.446373	.	76720000	77210000	51,160,44
2	77210000	77600000	ID_0.01_187	0.0586593	.	77210000	77600000	31120180
2	77600000	77870000	ID_0.01_188	-0.425071	.	77600000	77870000	51,160,44
2	77870000	78710000	ID_0.01_189	-0.749568	.	77870000	78710000	31120180
2	78710000	79350000	ID_0.01_190	-0.522336	.	78710000	79350000	51,160,44
2	79350000	79700000	ID_0.01_191	-0.0954106	.	79350000	79700000	31120180
2	79700000	80140000	ID_0.01_192	-0.440153	.	79700000	80140000	51,160,44
2	80140000	80590000	ID_0.01_193	-0.617485	.	80140000	80590000	31120180
2	80590000	83230000	ID_0.01_194	-0.67951	.	80590000	83230000	51,160,44
2	83230000	83450000	ID_0.01_195	-0.83026	.	83230000	83450000	31120180
2	83450000	83770000	ID_0.01_196	-0.762459	.	83450000	83770000	51,160,44
2	83770000	84270000	ID_0.01_197	-0.623952	.	83770000	84270000	31120180
2	84270000	84720000	ID_0.01_198	-0.521379	.	84270000	84720000	51,160,44
2	84720000	84890000	ID_0.01_199	0.141004	.	84720000	84890000	31120180
2	84890000	85140000	ID_0.01_200	-0.20573	.	84890000	85140000	51,160,44
2	85140000	85490000	ID_0.01_201	-0.339629	.	85140000	85490000	31120180
2	85490000	86400000	ID_0.01_202	-0.822438	.	85490000	86400000	51,160,44
2	86400000	87780000	ID_0.01_203	-0.874517	.	86400000	87780000	31120180
2	87780000	88120000	ID_0.01_204	-0.844832	.	87780000	88120000	51,160,44
2	88120000	88570000	ID_0.01_205	-0.953027	.	88120000	88570000	31120180
2	88570000	89030000	ID_0.01_206	-0.787831	.	88570000	89030000	51,160,44
2	89030000	89130000	ID_0.01_207	-0.793308	.	89030000	89130000	31120180
2	89130000	89970000	ID_0.01_208	-0.803683	.	89130000	89970000	51,160,44
2	89970000	90260000	ID_0.01_209	-0.788708	.	89970000	90260000	31120180
2	90260000	90520000	ID_0.01_210	-1.06074	.	90260000	90520000	51,160,44
2	90520000	90910000	ID_0.01_211	-0.250492	.	90520000	90910000	31120180
2	90910000	91110000	ID_0.01_212	0.390119	.	90910000	91110000	51,160,44
2	91110000	91370000	ID_0.01_213	0.42692	.	91110000	91370000	31120180
2	91370000	91490000	ID_0.01_214	0.0633928	.	91370000	91490000	51,160,44
2	91490000	91770000	ID_0.01_215	-0.130343	.	91490000	91770000	31120180
2	91770000	92300000	ID_0.01_216	-0.00346259	.	91770000	92300000	51,160,44
2	92300000	92700000	ID_0.01_217	-0.0047883	.	92300000	92700000	31120180
2	92700000	92910000	ID_0.01_218	0.261805	.	92700000	92910000	51,160,44
2	92910000	93040000	ID_0.01_219	0.905867	.	92910000	93040000	31120180
2	93040000	93310000	ID_0.01_220	0.45978	.	93040000	93310000	51,160,44
2	93310000	93670000	ID_0.01_221	0.697138	.	93310000	93670000	31120180
2	93670000	93870000	ID_0.01_222	-0.370467	.	93670000	93870000	51,160,44
2	93870000	94280000	ID_0.01_223	-0.221207	.	93870000	94280000	31120180
2	94280000	95050000	ID_0.01_224	-0.849747	.	94280000	95050000	51,160,44
2	95050000	96770000	ID_0.01_225	-0.762893	.	95050000	96770000	31120180
2	96770000	97070000	ID_0.01_226	-0.660645	.	96770000	97070000	51,160,44
2	97070000	97240000	ID_0.01_227	-0.683607	.	97070000	97240000	31120180
2	97240000	97490000	ID_0.01_228	-0.783284	.	97240000	97490000	51,160,44
2	97490000	97770000	ID_0.01_229	-0.767837	.	97490000	97770000	31120180
2	97770000	98980000	ID_0.01_230	-0.760421	.	97770000	98980000	51,160,44
2	98980000	99210000	ID_0.01_231	-0.792026	.	98980000	99210000	31120180
2	99210000	99450000	ID_0.01_232	-0.777682	.	99210000	99450000	51,160,44
2	99450000	100290000	ID_0.01_233	-0.752312	.	99450000	100290000	31120180
2	100290000	100620000	ID_0.01_234	-1.05124	.	100290000	100620000	51,160,44
2	100620000	101280000	ID_0.01_235	-1.12968	.	100620000	101280000	31120180
2	101280000	101500000	ID_0.01_236	-0.550522	.	101280000	101500000	51,160,44
2	101500000	101730000	ID_0.01_237	-0.407046	.	101500000	101730000	31120180
2	101730000	101880000	ID_0.01_238	0.271066	.	101730000	101880000	51,160,44
2	101880000	102310000	ID_0.01_239	0.670737	.	101880000	102310000	31120180
2	102310000	102920000	ID_0.01_240	0.0483327	.	102310000	102920000	51,160,44
2	102920000	103260000	ID_0.01_241	-0.202376	.	102920000	103260000	31120180
2	103260000	103600000	ID_0.01_242	-0.34303	.	103260000	103600000	51,160,44
2	103600000	103870000	ID_0.01_243	0.244799	.	103600000	103870000	31120180
2	103870000	104290000	ID_0.01_244	-0.420355	.	103870000	104290000	51,160,44
2	104290000	104500000	ID_0.01_245	0.175112	.	104290000	104500000	31120180
2	104500000	104690000	ID_0.01_246	-0.0618965	.	104500000	104690000	51,160,44
2	104690000	105090000	ID_0.01_247	-0.176672	.	104690000	105090000	31120180
2	105090000	105300000	ID_0.01_248	-0.311362	.	105090000	105300000	51,160,44
2	105300000	105780000	ID_0.01_249	-0.00437763	.	105300000	105780000	31120180
2	105780000	106170000	ID_0.01_250	-0.1439	.	105780000	106170000	51,160,44
2	106170000	106530000	ID_0.01_251	-0.57782	.	106170000	106530000	31120180
2	106530000	106820000	ID_0.01_252	0.832188	.	106530000	106820000	51,160,44
2	106820000	107300000	ID_0.01_253	-0.561518	.	106820000	107300000	31120180
2	107300000	107760000	ID_0.01_254	-0.378777	.	107300000	107760000	51,160,44
2	107760000	109100000	ID_0.01_255	-0.785011	.	107760000	109100000	31120180
2	109100000	109550000	ID_0.01_256	-0.45183	.	109100000	109550000	51,160,44
2	109550000	109730000	ID_0.01_257	-0.353178	.	109550000	109730000	31120180
2	109730000	110060000	ID_0.01_258	-0.602948	.	109730000	110060000	51,160,44
2	110060000	110420000	ID_0.01_259	-0.386261	.	110060000	110420000	31120180
2	110420000	110940000	ID_0.01_260	-0.568787	.	110420000	110940000	51,160,44
2	110940000	111190000	ID_0.01_261	-0.838408	.	110940000	111190000	31120180
2	111190000	111990000	ID_0.01_262	-0.78512	.	111190000	111990000	51,160,44
2	111990000	112340000	ID_0.01_263	-0.857694	.	111990000	112340000	31120180
2	112340000	112610000	ID_0.01_264	-0.496065	.	112340000	112610000	51,160,44
2	112610000	113080000	ID_0.01_265	-0.434153	.	112610000	113080000	31120180
2	113080000	113320000	ID_0.01_266	-0.337521	.	113080000	113320000	51,160,44
2	113320000	113690000	ID_0.01_267	-0.215662	.	113320000	113690000	31120180
2	113690000	114040000	ID_0.01_268	-0.630049	.	113690000	114040000	51,160,44
2	114040000	114280000	ID_0.01_269	-0.692305	.	114040000	114280000	31120180
2	114280000	115340000	ID_0.01_270	-0.377982	.	114280000	115340000	51,160,44
2	115340000	115680000	ID_0.01_271	0.159872	.	115340000	115680000	31120180
2	115680000	115950000	ID_0.01_272	0.124495	.	115680000	115950000	51,160,44
2	115950000	116250000	ID_0.01_273	-0.564883	.	115950000	116250000	31120180
2	116250000	116400000	ID_0.01_274	-0.399972	.	116250000	116400000	51,160,44
2	116400000	116670000	ID_0.01_275	-0.465768	.	116400000	116670000	31120180
2	116670000	117080000	ID_0.01_276	-0.644622	.	116670000	117080000	51,160,44
2	117080000	117310000	ID_0.01_277	-0.166818	.	117080000	117310000	31120180
2	117310000	117940000	ID_0.01_278	-0.243186	.	117310000	117940000	51,160,44
2	117940000	118080000	ID_0.01_279	0.0237338	.	117940000	118080000	31120180
2	118080000	118270000	ID_0.01_280	-0.101782	.	118080000	118270000	51,160,44
2	118270000	118450000	ID_0.01_281	0.368573	.	118270000	118450000	31120180
2	118450000	118860000	ID_0.01_282	0.462341	.	118450000	118860000	51,160,44
2	118860000	119030000	ID_0.01_283	0.205099	.	118860000	119030000	31120180
2	119030000	119300000	ID_0.01_284	0.309129	.	119030000	119300000	51,160,44
2	119300000	119490000	ID_0.01_285	0.244599	.	119300000	119490000	31120180
2	119490000	119790000	ID_0.01_286	0.116106	.	119490000	119790000	51,160,44
2	119790000	120160000	ID_0.01_287	0.33969	.	119790000	120160000	31120180
2	120160000	120710000	ID_0.01_288	0.00593359	.	120160000	120710000	51,160,44
2	120710000	120970000	ID_0.01_289	0.017294	.	120710000	120970000	31120180
2	120970000	121290000	ID_0.01_290	0.122858	.	120970000	121290000	51,160,44
2	121290000	121860000	ID_0.01_291	-0.582016	.	121290000	121860000	31120180
2	121860000	122200000	ID_0.01_292	-0.40063	.	121860000	122200000	51,160,44
2	122200000	122610000	ID_0.01_293	-0.369198	.	122200000	122610000	31120180
2	122610000	123100000	ID_0.01_294	-0.597004	.	122610000	123100000	51,160,44
2	123100000	123320000	ID_0.01_295	-0.575851	.	123100000	123320000	31120180
2	123320000	123780000	ID_0.01_296	-0.404417	.	123320000	123780000	51,160,44
2	123780000	123870000	ID_0.01_297	-0.528943	.	123780000	123870000	31120180
2	123870000	124420000	ID_0.01_298	-0.499535	.	123870000	124420000	51,160,44
2	124420000	125070000	ID_0.01_299	-0.0191009	.	124420000	125070000	31120180
2	125070000	125440000	ID_0.01_300	-0.573899	.	125070000	125440000	51,160,44
2	125440000	125700000	ID_0.01_301	-0.216147	.	125440000	125700000	31120180
2	125700000	125880000	ID_0.01_302	-0.24241	.	125700000	125880000	51,160,44
2	125880000	126360000	ID_0.01_303	0.0010218	.	125880000	126360000	31120180
2	126360000	126850000	ID_0.01_304	-0.419284	.	126360000	126850000	51,160,44
2	126850000	127060000	ID_0.01_305	-0.0841896	.	126850000	127060000	31120180
2	127060000	127310000	ID_0.01_306	0.189995	.	127060000	127310000	51,160,44
2	127310000	127620000	ID_0.01_307	0.443433	.	127310000	127620000	31120180
2	127620000	127940000	ID_0.01_308	-0.475234	.	127620000	127940000	51,160,44
2	127940000	128240000	ID_0.01_309	0.608292	.	127940000	128240000	31120180
2	128240000	128430000	ID_0.01_310	0.224353	.	128240000	128430000	51,160,44
2	128430000	128690000	ID_0.01_311	-0.34598	.	128430000	128690000	31120180
2	128690000	128920000	ID_0.01_312	0.0331139	.	128690000	128920000	51,160,44
2	128920000	129130000	ID_0.01_313	0.322257	.	128920000	129130000	31120180
2	129130000	129270000	ID_0.01_314	-0.223081	.	129130000	129270000	51,160,44
2	129270000	129490000	ID_0.01_315	-0.202943	.	129270000	129490000	31120180
2	129490000	129700000	ID_0.01_316	0.203995	.	129490000	129700000	51,160,44
2	129700000	130000000	ID_0.01_317	0.0859292	.	129700000	130000000	31120180
2	130000000	130100000	ID_0.01_318	0.196549	.	130000000	130100000	51,160,44
2	130100000	130270000	ID_0.01_319	0.0844205	.	130100000	130270000	31120180
2	130270000	130420000	ID_0.01_320	0.254981	.	130270000	130420000	51,160,44
2	130420000	130780000	ID_0.01_321	0.224979	.	130420000	130780000	31120180
2	130780000	131090000	ID_0.01_322	-0.0759884	.	130780000	131090000	51,160,44
2	131090000	131240000	ID_0.01_323	0.68518	.	131090000	131240000	31120180
2	131240000	131380000	ID_0.01_324	0.626641	.	131240000	131380000	51,160,44
2	131380000	131640000	ID_0.01_325	-0.153763	.	131380000	131640000	31120180
2	131640000	131780000	ID_0.01_326	-0.0371617	.	131640000	131780000	51,160,44
2	131780000	132080000	ID_0.01_327	0.34792	.	131780000	132080000	31120180
2	132080000	132320000	ID_0.01_328	-0.479874	.	132080000	132320000	51,160,44
2	132320000	132800000	ID_0.01_329	0.23126	.	132320000	132800000	31120180
2	132800000	133370000	ID_0.01_330	-0.609626	.	132800000	133370000	51,160,44
2	133370000	134360000	ID_0.01_331	0.028922	.	133370000	134360000	31120180
2	134360000	135170000	ID_0.01_332	-0.594708	.	134360000	135170000	51,160,44
2	135170000	135780000	ID_0.01_333	-0.731036	.	135170000	135780000	31120180
2	135780000	135970000	ID_0.01_334	-0.396486	.	135780000	135970000	51,160,44
2	135970000	136290000	ID_0.01_335	-0.433747	.	135970000	136290000	31120180
2	136290000	136720000	ID_0.01_336	-0.362058	.	136290000	136720000	51,160,44
2	136720000	136910000	ID_0.01_337	-0.381534	.	136720000	136910000	31120180
2	136910000	137550000	ID_0.01_338	-0.199331	.	136910000	137550000	51,160,44
2	137550000	137810000	ID_0.01_339	-0.0152807	.	137550000	137810000	31120180
2	137810000	138360000	ID_0.01_340	-0.718962	.	137810000	138360000	51,160,44
2	138360000	138660000	ID_0.01_341	-0.241762	.	138360000	138660000	31120180
2	138660000	139200000	ID_0.01_342	-0.330874	.	138660000	139200000	51,160,44
2	139200000	139380000	ID_0.01_343	-0.610334	.	139200000	139380000	31120180
2	139380000	139570000	ID_0.01_344	-0.188013	.	139380000	139570000	51,160,44
2	139570000	140270000	ID_0.01_345	0.24318	.	139570000	140270000	31120180
2	140270000	140480000	ID_0.01_346	-0.678931	.	140270000	140480000	51,160,44
2	140480000	141380000	ID_0.01_347	-0.531089	.	140480000	141380000	31120180
2	141380000	141930000	ID_0.01_348	-0.0442473	.	141380000	141930000	51,160,44
2	141930000	142090000	ID_0.01_349	-0.0939704	.	141930000	142090000	31120180
2	142090000	142680000	ID_0.01_350	-0.301684	.	142090000	142680000	51,160,44
2	142680000	142930000	ID_0.01_351	-0.37634	.	142680000	142930000	31120180
2	142930000	143620000	ID_0.01_352	-0.623742	.	142930000	143620000	51,160,44
2	143620000	143810000	ID_0.01_353	-0.489542	.	143620000	143810000	31120180
2	143810000	144100000	ID_0.01_354	0.157108	.	143810000	144100000	51,160,44
2	144100000	144420000	ID_0.01_355	0.152557	.	144100000	144420000	31120180
2	144420000	144970000	ID_0.01_356	-0.55055	.	144420000	144970000	51,160,44
2	144970000	145420000	ID_0.01_357	-0.29281	.	144970000	145420000	31120180
2	145420000	145760000	ID_0.01_358	-0.302041	.	145420000	145760000	51,160,44
2	145760000	146270000	ID_0.01_359	-0.188331	.	145760000	146270000	31120180
2	146270000	146440000	ID_0.01_360	-0.311701	.	146270000	146440000	51,160,44
2	146440000	146680000	ID_0.01_361	-0.253668	.	146440000	146680000	31120180
2	146680000	147160000	ID_0.01_362	0.372475	.	146680000	147160000	51,160,44
2	147160000	147620000	ID_0.01_363	-0.364696	.	147160000	147620000	31120180
2	147620000	147940000	ID_0.01_364	-0.231177	.	147620000	147940000	51,160,44
2	147940000	148200000	ID_0.01_365	-0.255522	.	147940000	148200000	31120180
2	148200000	148780000	ID_0.01_366	0.322978	.	148200000	148780000	51,160,44
2	148780000	150010000	ID_0.01_367	-0.685151	.	148780000	150010000	31120180
2	150010000	150330000	ID_0.01_368	-0.820664	.	150010000	150330000	51,160,44
2	150330000	151240000	ID_0.01_369	-0.859769	.	150330000	151240000	31120180
2	151240000	151540000	ID_0.01_370	-1.18092	.	151240000	151540000	51,160,44
2	151540000	151690000	ID_0.01_371	-0.0509386	.	151540000	151690000	31120180
2	151690000	151850000	ID_0.01_372	0.378286	.	151690000	151850000	51,160,44
2	151850000	152440000	ID_0.01_373	0.240144	.	151850000	152440000	31120180
2	152440000	152720000	ID_0.01_374	0.119738	.	152440000	152720000	51,160,44
2	152720000	152980000	ID_0.01_375	-0.0377496	.	152720000	152980000	31120180
2	152980000	153250000	ID_0.01_376	0.14715	.	152980000	153250000	51,160,44
2	153250000	153480000	ID_0.01_377	0.478639	.	153250000	153480000	31120180
2	153480000	153800000	ID_0.01_378	-0.114352	.	153480000	153800000	51,160,44
2	153800000	154180000	ID_0.01_379	-0.0949573	.	153800000	154180000	31120180
2	154180000	154480000	ID_0.01_380	-0.420871	.	154180000	154480000	51,160,44
2	154480000	154770000	ID_0.01_381	0.267914	.	154480000	154770000	31120180
2	154770000	154900000	ID_0.01_382	0.439824	.	154770000	154900000	51,160,44
2	154900000	155040000	ID_0.01_383	0.144759	.	154900000	155040000	31120180
2	155040000	155270000	ID_0.01_384	0.221147	.	155040000	155270000	51,160,44
2	155270000	155480000	ID_0.01_385	0.0967686	.	155270000	155480000	31120180
2	155480000	155640000	ID_0.01_386	0.607834	.	155480000	155640000	51,160,44
2	155640000	155800000	ID_0.01_387	0.319156	.	155640000	155800000	31120180
2	155800000	156120000	ID_0.01_388	0.31922	.	155800000	156120000	51,160,44
2	156120000	156350000	ID_0.01_389	-0.0302026	.	156120000	156350000	31120180
2	156350000	156560000	ID_0.01_390	0.529553	.	156350000	156560000	51,160,44
2	156560000	157110000	ID_0.01_391	0.105919	.	156560000	157110000	31120180
2	157110000	157420000	ID_0.01_392	-0.121865	.	157110000	157420000	51,160,44
2	157420000	157860000	ID_0.01_393	-0.144679	.	157420000	157860000	31120180
2	157860000	158030000	ID_0.01_394	0.260389	.	157860000	158030000	51,160,44
2	158030000	158210000	ID_0.01_395	0.499214	.	158030000	158210000	31120180
2	158210000	158690000	ID_0.01_396	-0.336954	.	158210000	158690000	51,160,44
2	158690000	159270000	ID_0.01_397	-0.293477	.	158690000	159270000	31120180
2	159270000	159410000	ID_0.01_398	0.242678	.	159270000	159410000	51,160,44
2	159410000	159710000	ID_0.01_399	0.0657081	.	159410000	159710000	31120180
2	159710000	159840000	ID_0.01_400	0.322265	.	159710000	159840000	51,160,44
2	159840000	160200000	ID_0.01_401	0.359771	.	159840000	160200000	31120180
2	160200000	160420000	ID_0.01_402	0.316341	.	160200000	160420000	51,160,44
2	160420000	160790000	ID_0.01_403	-0.287131	.	160420000	160790000	31120180
2	160790000	161500000	ID_0.01_404	-0.286451	.	160790000	161500000	51,160,44
2	161500000	161770000	ID_0.01_405	-0.0799768	.	161500000	161770000	31120180
2	161770000	162520000	ID_0.01_406	-0.0563653	.	161770000	162520000	51,160,44
2	162520000	162730000	ID_0.01_407	-0.28623	.	162520000	162730000	31120180
2	162730000	163250000	ID_0.01_408	-0.422823	.	162730000	163250000	51,160,44
2	163250000	163650000	ID_0.01_409	-0.225282	.	163250000	163650000	31120180
2	163650000	163900000	ID_0.01_410	-0.0962465	.	163650000	163900000	51,160,44
2	163900000	164220000	ID_0.01_411	-0.349846	.	163900000	164220000	31120180
2	164220000	164400000	ID_0.01_412	-0.0865626	.	164220000	164400000	51,160,44
2	164400000	164570000	ID_0.01_413	0.0440763	.	164400000	164570000	31120180
2	164570000	164730000	ID_0.01_414	-0.204656	.	164570000	164730000	51,160,44
2	164730000	165210000	ID_0.01_415	-0.0314089	.	164730000	165210000	31120180
2	165210000	165320000	ID_0.01_416	0.175964	.	165210000	165320000	51,160,44
2	165320000	165600000	ID_0.01_417	-0.0407128	.	165320000	165600000	31120180
2	165600000	165900000	ID_0.01_418	0.162815	.	165600000	165900000	51,160,44
2	165900000	166390000	ID_0.01_419	-0.0851782	.	165900000	166390000	31120180
2	166390000	166880000	ID_0.01_420	-0.0966586	.	166390000	166880000	51,160,44
2	166880000	167100000	ID_0.01_421	-0.216771	.	166880000	167100000	31120180
2	167100000	167310000	ID_0.01_422	0.477009	.	167100000	167310000	51,160,44
2	167310000	167490000	ID_0.01_423	-0.00815986	.	167310000	167490000	31120180
2	167490000	167930000	ID_0.01_424	0.149512	.	167490000	167930000	51,160,44
2	167930000	168060000	ID_0.01_425	0.0728783	.	167930000	168060000	31120180
2	168060000	168280000	ID_0.01_426	-0.103684	.	168060000	168280000	51,160,44
2	168280000	168500000	ID_0.01_427	0.799481	.	168280000	168500000	31120180
2	168500000	168780000	ID_0.01_428	0.471784	.	168500000	168780000	51,160,44
2	168780000	169190000	ID_0.01_429	-0.31417	.	168780000	169190000	31120180
2	169190000	169450000	ID_0.01_430	0.828846	.	169190000	169450000	51,160,44
2	169450000	169680000	ID_0.01_431	0.664418	.	169450000	169680000	31120180
2	169680000	169930000	ID_0.01_432	0.602349	.	169680000	169930000	51,160,44
2	169930000	170220000	ID_0.01_433	-0.22675	.	169930000	170220000	31120180
2	170220000	170340000	ID_0.01_434	0.141235	.	170220000	170340000	51,160,44
2	170340000	170710000	ID_0.01_435	0.0594439	.	170340000	170710000	31120180
2	170710000	171310000	ID_0.01_436	-0.379011	.	170710000	171310000	51,160,44
2	171310000	172040000	ID_0.01_437	0.404085	.	171310000	172040000	31120180
2	172040000	172640000	ID_0.01_438	-0.423235	.	172040000	172640000	51,160,44
2	172640000	172920000	ID_0.01_439	0.525698	.	172640000	172920000	31120180
2	172920000	173020000	ID_0.01_440	0.121938	.	172920000	173020000	51,160,44
2	173020000	173410000	ID_0.01_441	0.291585	.	173020000	173410000	31120180
2	173410000	173950000	ID_0.01_442	-0.372285	.	173410000	173950000	51,160,44
2	173950000	174120000	ID_0.01_443	0.19218	.	173950000	174120000	31120180
2	174120000	174500000	ID_0.01_444	-0.388022	.	174120000	174500000	51,160,44
2	174500000	176550000	ID_0.01_445	0.816544	.	174500000	176550000	31120180
2	176550000	177330000	ID_0.01_446	-1.66721	.	176550000	177330000	51,160,44
2	177330000	177530000	ID_0.01_447	-1.24094	.	177330000	177530000	31120180
2	177530000	178130000	ID_0.01_448	-1.23196	.	177530000	178130000	51,160,44
2	178130000	178470000	ID_0.01_449	-0.315071	.	178130000	178470000	31120180
2	178470000	178620000	ID_0.01_450	0.556711	.	178470000	178620000	51,160,44
2	178620000	178940000	ID_0.01_451	0.66098	.	178620000	178940000	31120180
2	178940000	179630000	ID_0.01_452	0.282725	.	178940000	179630000	51,160,44
2	179630000	179790000	ID_0.01_453	-0.101609	.	179630000	179790000	31120180
2	179790000	180000000	ID_0.01_454	0.400357	.	179790000	180000000	51,160,44
2	180000000	180330000	ID_0.01_455	0.199043	.	180000000	180330000	31120180
2	180330000	180520000	ID_0.01_456	0.703697	.	180330000	180520000	51,160,44
2	180520000	180610000	ID_0.01_457	0.188378	.	180520000	180610000	31120180
2	180610000	180890000	ID_0.01_458	0.337192	.	180610000	180890000	51,160,44
2	180890000	181100000	ID_0.01_459	0.357147	.	180890000	181100000	31120180
2	181100000	181440000	ID_0.01_460	0.375913	.	181100000	181440000	51,160,44

## Sheet: Supplementary Table S4
Supplementary Table 4. Primers used for site-directed mutagenesis. Red letters show nucleotide base pairs that were mutated.
Site-directed mutagenesis primers	Forward
Wild type LADLRM	AGAAGCAGGAAAGGCAGCGGATATAAAATTTTATTATTTC
Δ ETS	AGAAGCGAATTCGGCAGCGGATATAAAATTTTATTATTTC
Restriction enzyme inserted	EcoRI
LASARM1	ACCCTGCGCCCCTTTGATCTGGGCACAG
Δ TCF	ACCCTGCGCCCAGAATTCCTGGGCACAG
Restriction enzyme inserted	EcoRI
Wild type LASARM	GAATTTAGATCTAGCACTTCCTCAGCTATGCTCC
Δ ETS[1]	GAATTTGCTGGCAGCACCATGGCAGCTATGCTCC
Restriction enzyme inserted	NcoI
Wild type LASARM	GTAAATAACGAAAGGAAGGAAGTCTCTTAAAATTTACTACATTCC
Δ ETS[2]	GTAAATAACGAAAGCTTAAGAGTCTCTTAAAATTTACTACATTCC
Restriction enzyme inserted	AflII
Wild type LASARM	ACACATGATGCATGAAAGAACTGACAGAAATTC
Δ TCF	ACACATGATGCTGAGCTCAACTGACAGAAATTC
Restriction enzyme inserted	ScaI
Wild type ZRS	AACATCCTGACCAATTATCCAAATTATCCAG
Δ LHX2 binding site 1	AACATCCTGACCAGAGTCTCAAATTATCCAG
Restriction enzyme inserted	None
Wild type ZRS	TTCCTTGCTTAATT AATTAGGTAGACCAGGTGGAAG
Δ LHX2 binding site 2	TTCCTTGCTTATGAGCTCTAGGTAG
Restriction enzyme inserted	ScaI
p values from Dunett's parwise multiple comparison test.
CRM (-8)/ LADLRM
LADLRM vs. ΔETS/ TCF	p <0.0001
LADLRM vs. ΔETS	p <0.0001
LADLRM vs. ΔTCF	p <0.0001
LADLRM vs. tk-eGFP	p <0.0001
tk-eGFP vs LADLRM	p <0.0001
tk-eGFP vs. ΔETS/ TCF	ns = 0.9999
tk-eGFP vs. ΔETS	p <0.0261
tk-eGFP vs. ΔTCF	ns = 0.9999
CRM (-9)/ LASARM
LASARM vs. ΔETS [1/2]	p <0.0001
LASARM vs. ΔETS [1]	p <0.0078
LASARM vs. ΔETS [2]	p <0.0001
LASARM vs. ΔTCF	p <0.0001
LASARM vs. tk-eGFP	p <0.0001
tk-eGFP vs. LASARM	p <0.0001
tk-eGFP vs. ΔETS [1/2]	ns = 0.7323
tk-eGFP vs. ΔETS [1]	p < 0.0149
tk-eGFP vs. ΔETS [2]	ns = 0.9472
tk-eGFP vs. ΔTCF	ns = 0.9998

## Sheet: Supplementary Table S5
Supplementary Table 5
Ets and Tcf/Lef transcripts expressed in E11 limb bud cells
Total limb bud cells	18153
Total Lhx2+ cells	7028
Total Lhx2- cells	11125
Transcript	# of expressing cells	# of cells co-expressing with Lhx2+ cells	% of cells co-expressing with Lhx2+ cells	# of cells expressed in Lhx2- cells	% of cells expressed in Lhx2- cells	Ratio of Lhx2+/Lhx2-
Mxs1 +	6898	4676	66.53	2222	19.97	3.3315
Wnt5a +	5143	2767	39.37	2376	21.36	1.84316
Meis2+	8047	2472	35.17	5575	50.11	0.701856
Ets1+	2318	874	12.44	1444	12.98	0.958398
Ets2+	5965	2843	40.45	3122	28.06	1.44155
Elk3+	4155	2051	29.18	2104	18.91	1.5431
Elk4+	1200	533	7.58	667	6	1.26333
Etv1+	823	394	5.61	429	3.86	1.45337
Etv2+	293	204	2.9	89	0.8	3.625
Etv4+	4230	2605	37.07	1625	14.61	2.5373
Etv5+	3431	2093	29.78	1338	12.03	2.47548
Tcf3+	14149	6042	85.97	8107	72.87	1.17977
Tcf4+	12331	5078	72.25	7253	65.2	1.10813
Tcf12	13294	5616	79.91	7678	69.02	1.15778
Tcf7+	1868	1126	16.02	742	6.67	2.4018
Lef1+	5265	2762	39.3	2503	22.5	1.74667
Cdh1+	165	23	0.33	142	1.28	0.257812
